# Supplementary material for: Unexpected highly reversible topotactic CO2 sorption/desorption capacity for potassium dititanate
Source: Royal Society of Chemistry journal article supplement (doi:10.1039/c6ta04117e), 2016-01-01
Supplement: c6ta04117e1.pdf [file c6ta04117e1.pdf]

**Supplementary information**

**Unexpected highly reversible topotactic CO<sub>2</sub>  
sorption/desorption capacity for potassium dititanate**

Qianwen Zheng<sup>1</sup>, Liang Huang<sup>1</sup>, Yu Zhang<sup>1</sup>, Junya Wang<sup>1</sup>, Chen-Zi Zhao<sup>2</sup>, Qiang Zhang<sup>2</sup>, Weijie Zheng<sup>3</sup>, Dapeng Cao<sup>3</sup>, Dermot O'Hare<sup>4</sup>, Qiang Wang<sup>1,\*</sup>

<sup>1</sup>College of Environmental Science and Engineering, Beijing Forestry University, 35 Tsinghua East Road, Haidian District, Beijing 100083, P. R. China

<sup>2</sup>Department of Chemical Engineering, Tsinghua University, 1 Tsinghua Road, Haidian District, Beijing 100084, P. R. China

<sup>3</sup>Division of Molecular and Materials Simulation, State Key Laboratory of Organic–Inorganic Composites, Beijing University of Chemical Technology, Beijing 100029, P. R. China

<sup>4</sup>Chemistry Research Laboratory, Department of Chemistry, University of Oxford, Mansfield Road, Oxford OX1 3TA, United Kingdom

\*Corresponding author:

Professor Qiang Wang, College of Environmental Science and Engineering, Beijing Forestry University, 35 Qinghua East Road, Haidian District, Beijing 100083, P. R. China

Tel.: 86-13699130626

E-mail: [qiang.wang.ox@gmail.com](mailto:qiang.wang.ox@gmail.com); [qiangwang@bjfu.edu.cn](mailto:qiangwang@bjfu.edu.cn)

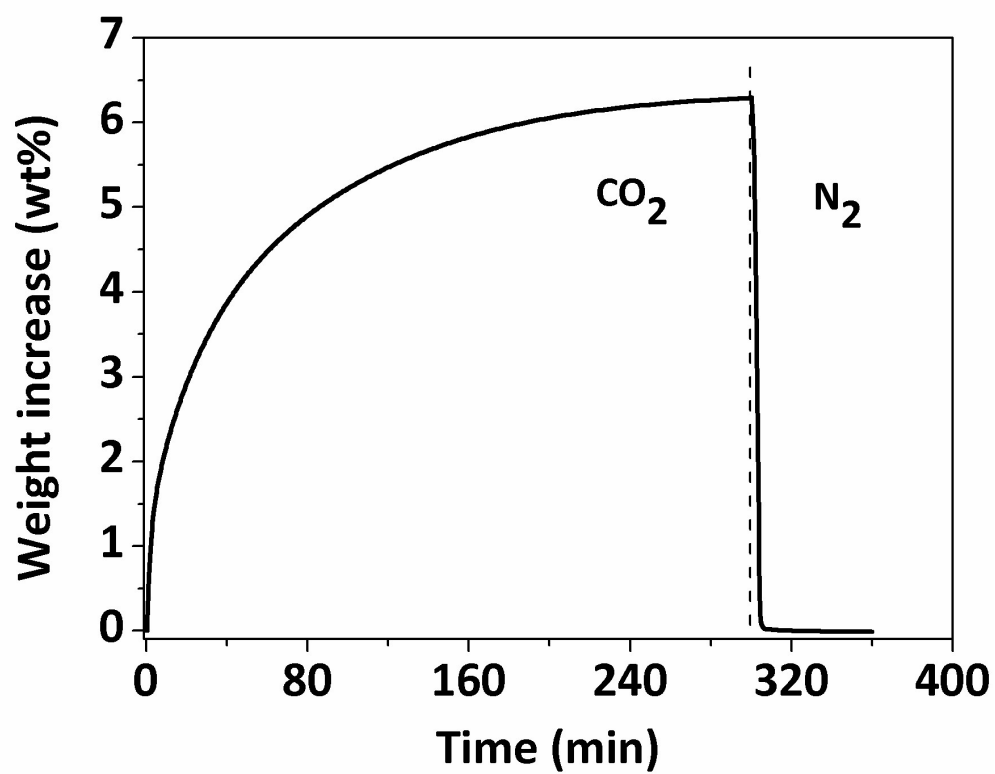

**Figure S1.** One CO<sub>2</sub> sorption/desorption cycle over K<sub>2</sub>Ti<sub>2</sub>O<sub>5</sub> both tested at 750 °C, which clearly indicates that the regeneration of the adsorbent K<sub>2</sub>Ti<sub>2</sub>O<sub>5</sub> in N<sub>2</sub> is very rapid (< 6 min).

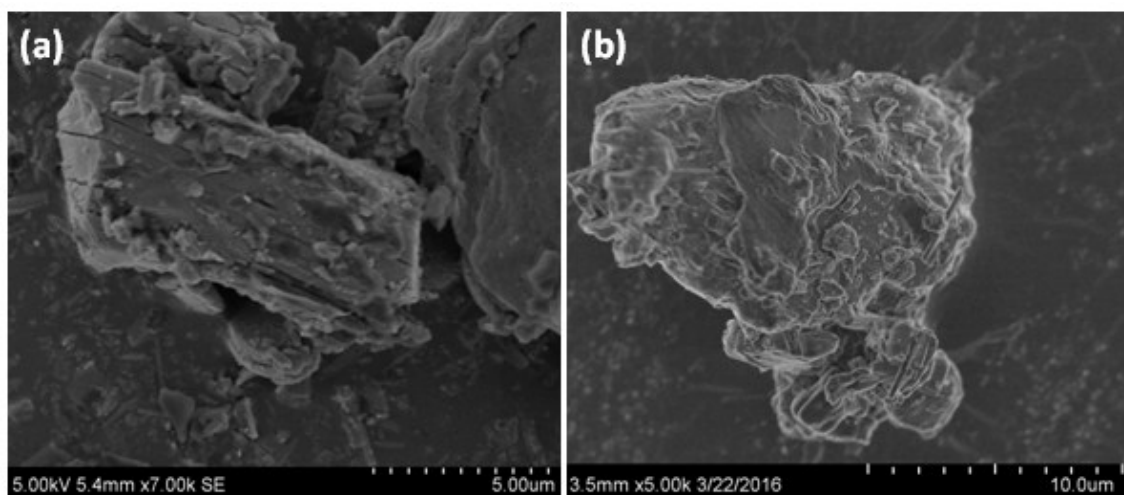

**Figure S2.** SEM images of (a) fresh  $K_2Ti_2O_5$ , and (b)  $K_2Ti_2O_5$  thermally treated at 750 °C in  $N_2$  for 10.0 h.

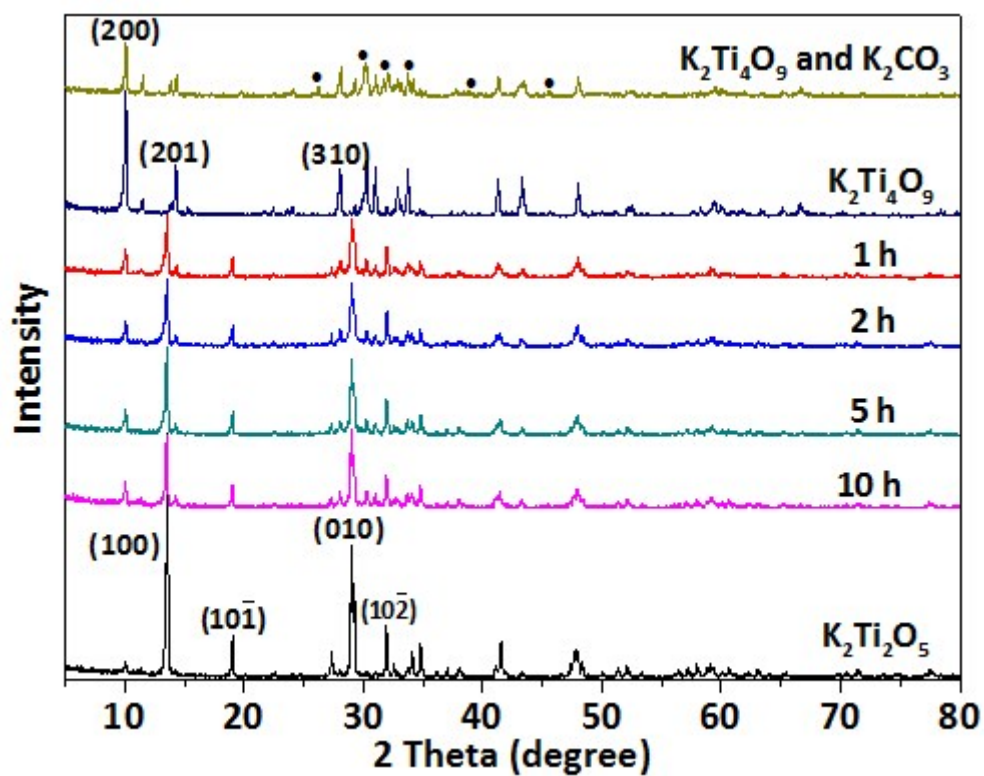

**Figure S3.** XRD patterns of fresh  $K_2Ti_2O_5$ , the mixture of  $K_2Ti_4O_9$  and  $K_2CO_3$ , and the thermally treated mixture of  $K_2Ti_4O_9$  and  $K_2CO_3$  with a ratio of 1:1 at 750 °C for 1.0, 2.0, 5.0, and 10.0 h, respectively, (●)  $K_2CO_3$ .
